# Supplementary material
Source: publisher figshare collection journal article supplement (https://sage.figshare.com/ndownloader/files/17398394)
Supplement: Supplementary file 1 [file 17398394]

## Supplementary Figure. IL-6 CSF levels and basic TMS parameters

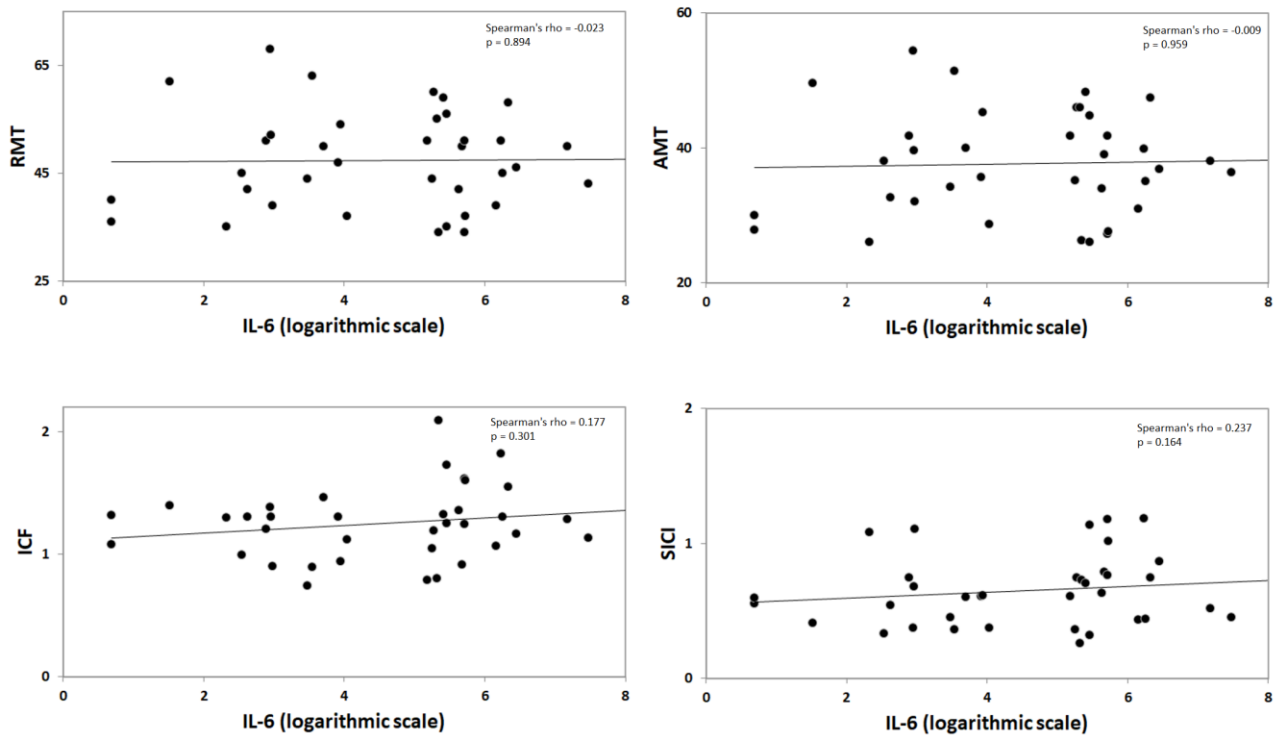

Correlations between IL-6 CSF levels and TMS parameters exploring basic physiological properties of the motor cortex. RMT and AMT are expressed as % of maximum stimulator output. SICI and ICF data are expressed as mean conditioned MEP amplitudes normalized to the mean unconditioned MEP. To obtain a better graphical representation, IL-6 concentrations are shown in logarithmic scale. Abbreviations: AMT = active motor threshold; CSF = cerebrospinal fluid; ICF = intracortical facilitation; MEP = motor evoked potential; RMT = resting motor threshold; SICI = short-interval intracortical inhibition.
